# Supplementary material for: Nucleotide based covalent inhibitors of KRas can only be efficient in vivo if they bind reversibly with GTP-like affinity
Source: PubMed Central journal article supplement (PMC5473928; doi:10.1038/s41598-017-03973-6), 2017-06-16
Supplement: 41598_2017_3973_MOESM1_ESM.pdf [file 41598_2017_3973_MOESM1_ESM.pdf]

**Nucleotide based covalent inhibitors of KRas can only be efficient *in vivo* if they bind reversibly with GTP-like affinity**

**Supplementary material**

Matthias P. Müller<sup>1,2</sup>, Sadasivam Jeganathan<sup>1</sup>, Angelika Heidrich<sup>1</sup>, Jeremy Campos<sup>1</sup> and Roger S. Goody<sup>1</sup>

<sup>1</sup>Department of Structural Biochemistry, Max Planck Institute of Molecular Physiology, Otto-Hahn-Straße 11, 44227 Dortmund, Germany

and

<sup>2</sup>Faculty of Chemistry and Chemical Biology, Dortmund University of Technology, Otto-Hahn-Straße 4a, D-44227 Dortmund, Germany

Correspondence:

Matthias P. Müller (matthias3.mueller@tu-dortmund.de)

Roger S. Goody (goody@mpi-dortmund.mpg.de)

## Supplementary Figure 1

### (A) Weak inhibitor

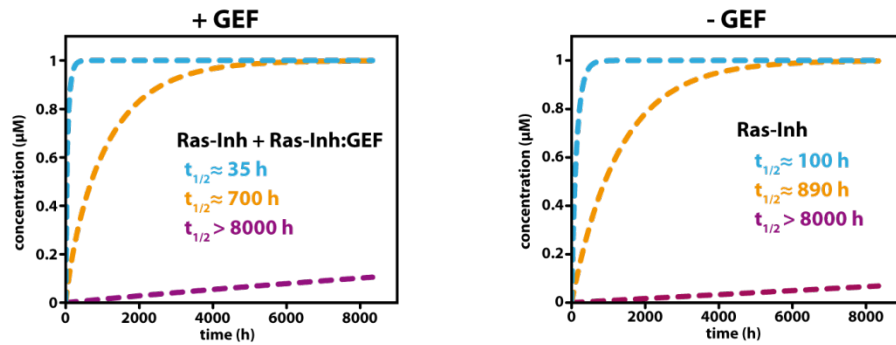

### (B) Strong inhibitor

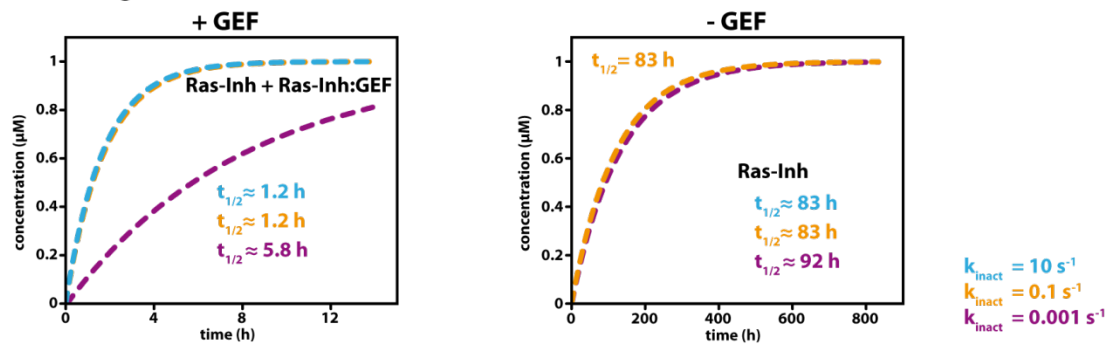

**Supplementary Figure 1: The effect of  $k_{\text{inact}}$ .** Simulations were repeated as shown in the main manuscript, but varying the rate constant of covalent reaction ( $k_{\text{inact}}$ ) of the inhibitor with KRas<sub>G12C</sub>. Whereas changes in the rate of covalent reaction have a strong impact on the half-life of the reaction for the weakly bound inhibitor **(A)**, the effect is less dramatic for the strongly bound inhibitor **(B)** and physiologically reasonable life-times can still be achieved with inhibitors that have a low reactivity and are therefore presumably more stable and selective *in vivo* regarding side reactions and inactivation of the inhibitor by e.g. glutathione.

## Supplementary Figure 2

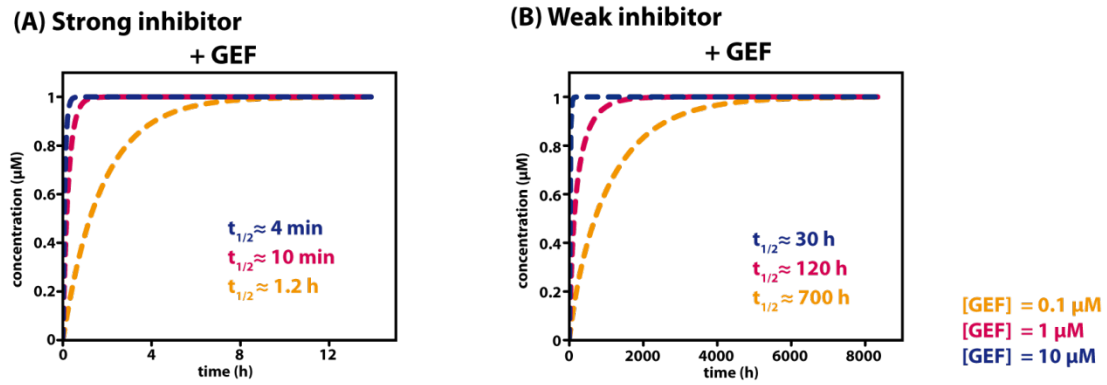

**Supplementary Figure 2: The effect of the concentration of GEF.** Simulations were made for the rate of covalent reaction of an inhibitor with KRas<sub>G12C</sub> using a strongly (A) or a weakly (B) binding inhibitor ( $k_{\text{inact}}$  was set to  $0.1 \text{ s}^{-1}$  in both cases).

## Supplementary Figure 3

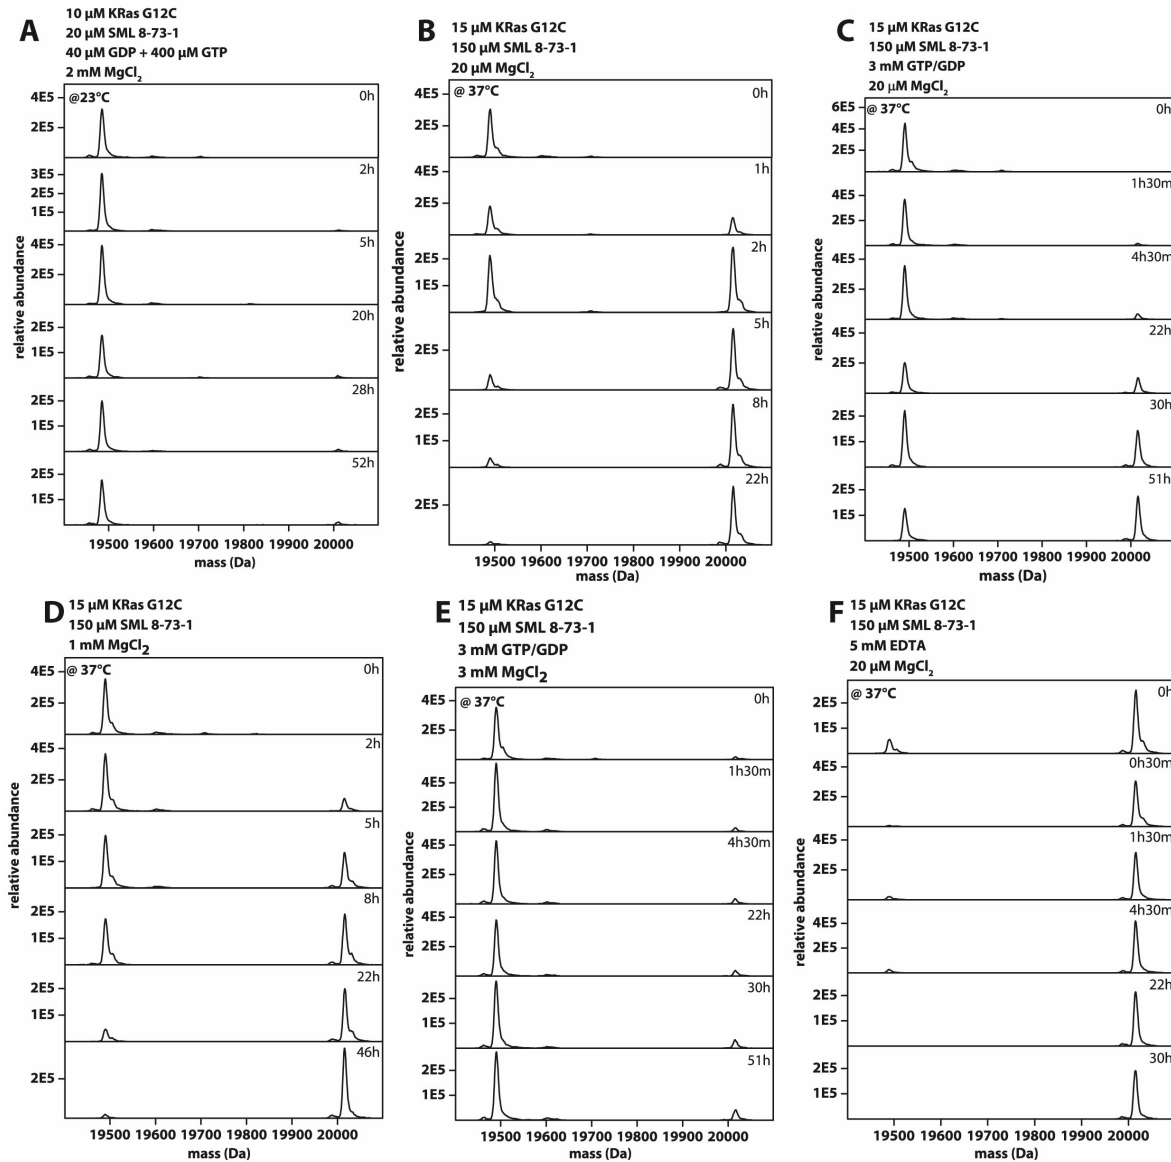

**Supplementary Figure 2:** Electrospray ionization mass spectrometric analysis (ESI-MS) of the covalent modification of KRasG12C by SML-8-73-1 under different conditions. The unmodified protein is seen at a mass of just under 19,500, and after modification at just over 20,000. The conditions are given for each reaction.
